# Supplementary material for: Liquid biopsy-based single-cell metabolic phenotyping of lung cancer patients for informative diagnostics
Source: PubMed Central journal article supplement (PMC6710267; doi:10.1038/s41467-019-11808-3), 2019-08-26
Supplement: 41467_2019_11808_MOESM1_ESM.pdf [file 41467_2019_11808_MOESM1_ESM.pdf]

## **Supplementary Materials**

### **Liquid biopsy-based single-cell metabolic phenotyping of lung cancer patients for informative diagnostics**

Li et al.,

## Supplementary Figures

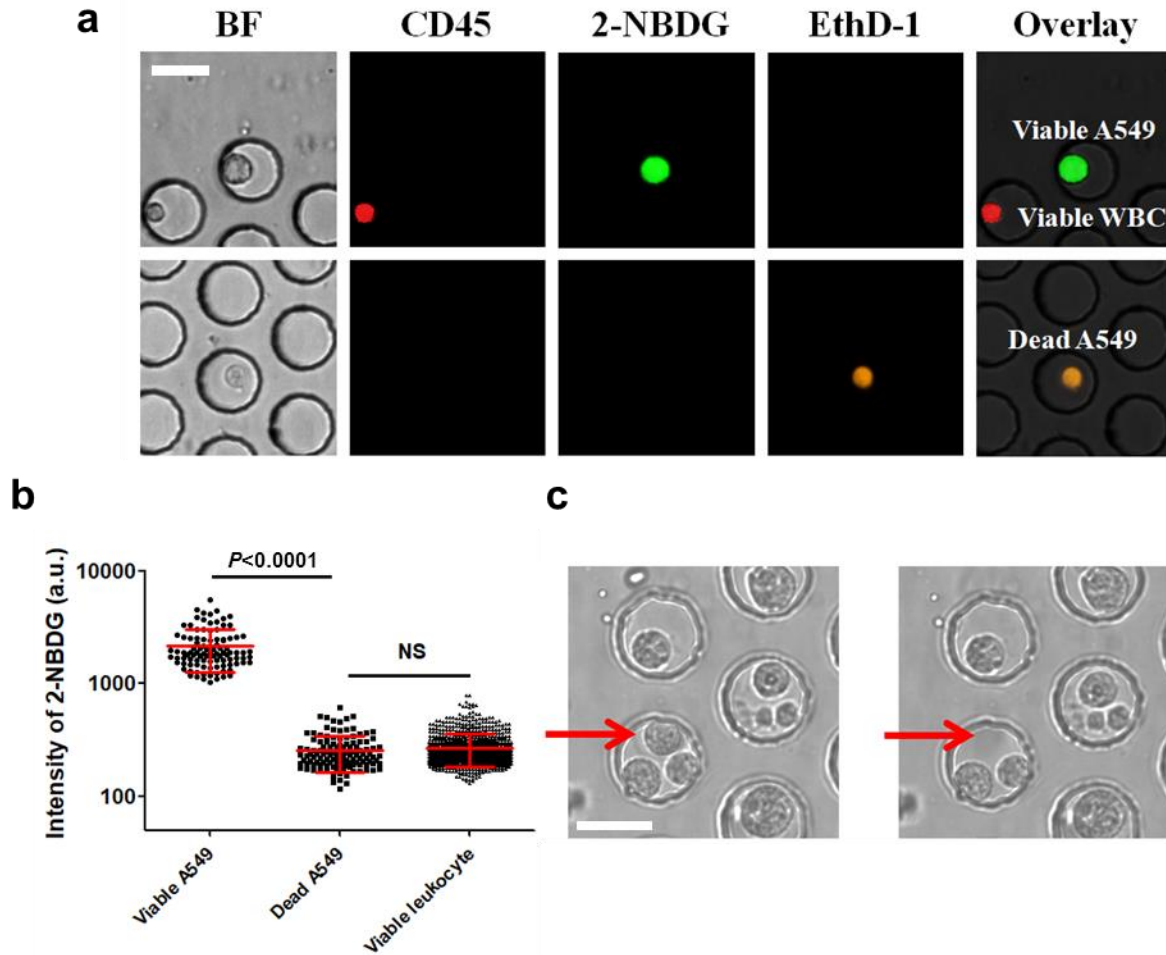

**Supplementary Fig. 1** **a** Fluorescent images of a viable A549 cell, a viable leukocyte and a dead A549 cell (scale bar, 30  $\mu\text{m}$ ). **b** 2-NBDG uptake of viable leukocytes ( $n=1011$ ), viable A549 cells ( $n=101$ ), and dead A549 cells ( $n=124$ ). Dead cells have minimal unspecific 2-NBDG signal (mean  $\pm$  SD). **c** Precise single-cell retrieval from a microwell containing multiple cells. Left, before single cell retrieval; Right, after single cell retrieval (scale bar, 30  $\mu\text{m}$ ). Source data are provided as a Source Data file.

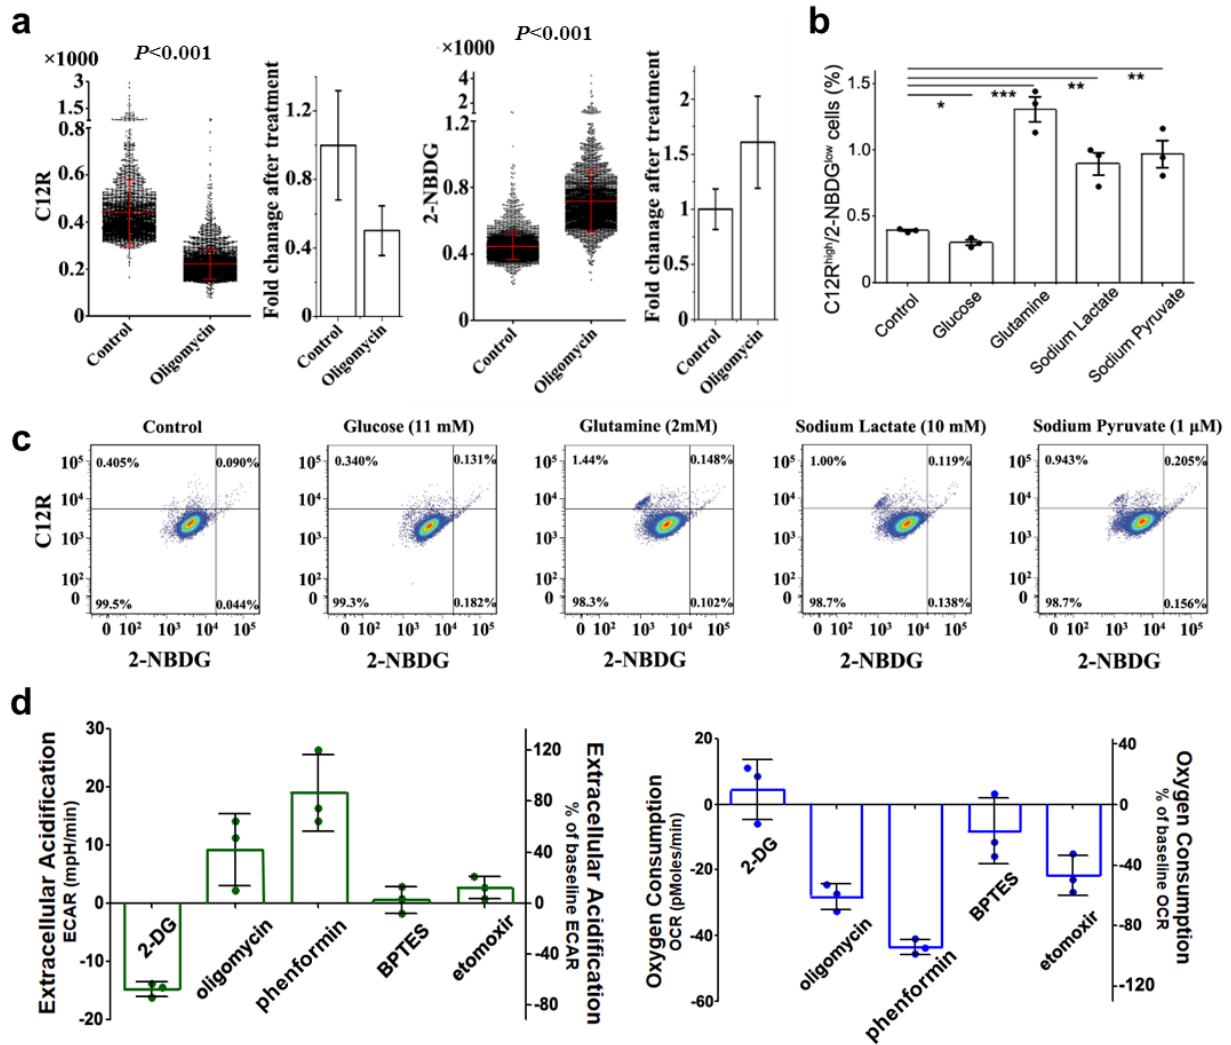

each condition). Each sample represented the average of ten cycles of ECAR and OCR measurements (mean  $\pm$  SD). Source data are provided as a Source Data file.

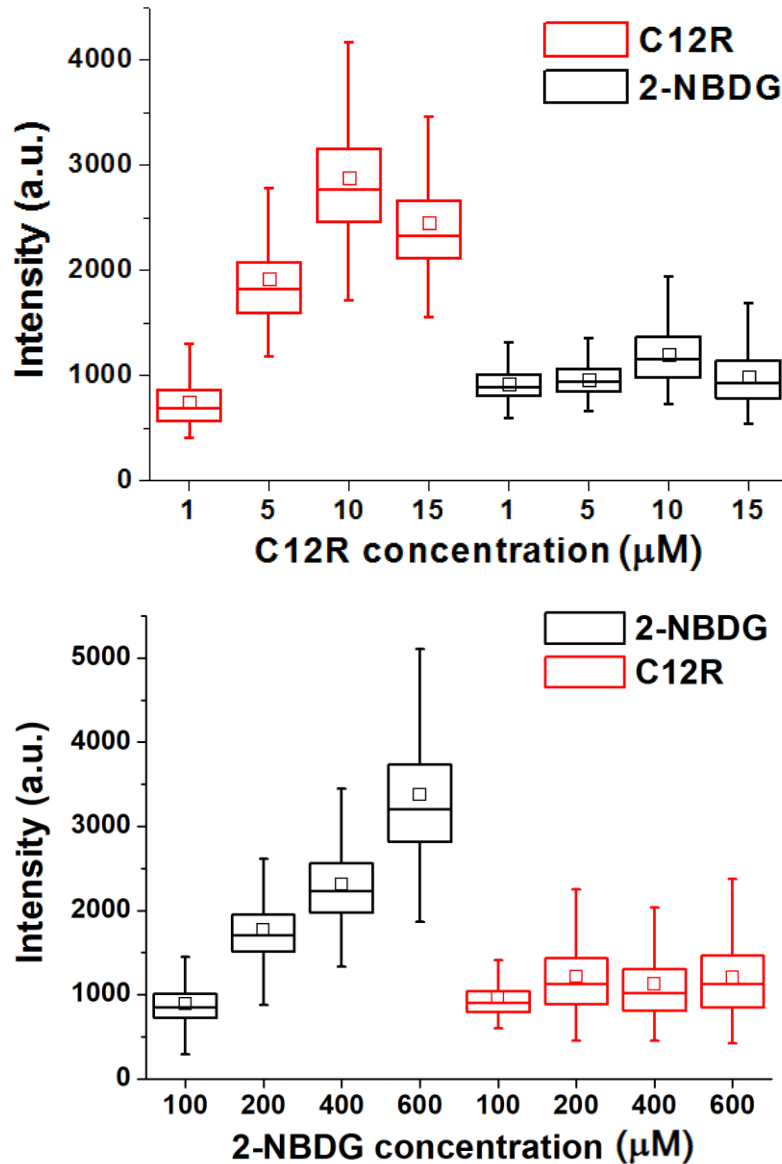

**Supplementary Fig. 3.** Validation of mutual interference of the two metabolic probes. Top, box chart of fluorescence intensity of C12R and 2-NBDG uptake in A549 cells under variable C12R concentrations (1  $\mu\text{M}$ , 5  $\mu\text{M}$ , 10  $\mu\text{M}$  and 15  $\mu\text{M}$ ) and a fixed 2-NBDG concentration (100  $\mu\text{M}$ ) by on-chip metabolic cytometry; Bottom, box chart of fluorescence intensity of C12R and 2-NBDG uptake in A549 cells under variable 2-NBDG concentrations (100  $\mu\text{M}$ , 200  $\mu\text{M}$ , 400  $\mu\text{M}$  and 600  $\mu\text{M}$ ) and a fixed C12R concentration (1  $\mu\text{M}$ ) by on-chip metabolic cytometry. The data was generated from single-cell measurements for each condition (Top, left to right,  $n=1030$ , 960, 1110, 941, 1036, 987,

1096, 931; Bottom, left to right, n=6773, 7401, 6886, 7078, 6862, 7267, 6841, 7058) and represented in box plots (center line, median; square, mean; box limits, upper and lower quartiles; whiskers, 1.5\*inter-quartile range). Source data are provided as a Source Data file.

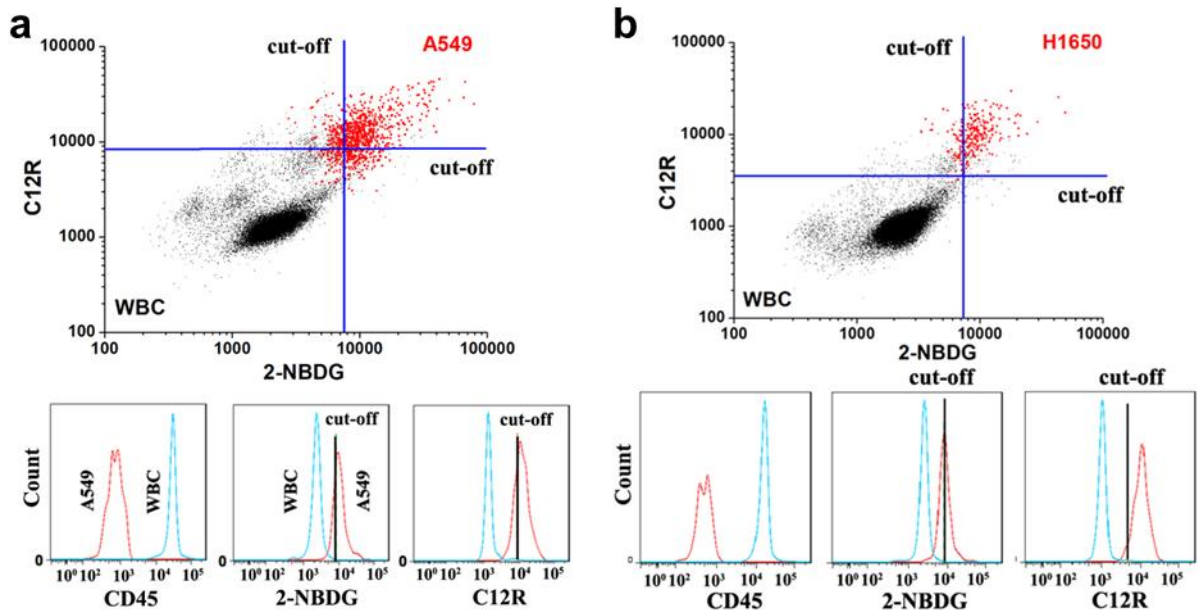

**Supplementary Fig. 4** Cut-off determination for separating putative metabolically active tumor cells from leukocytes. Top, scatter plot generated from flow cytometry reports 2-NBDG and C12R fluorescence intensity of leukocytes spiked with (a) A549 and (b) H1650 cells. Leukocytes were isolated from the blood of a healthy donor. Bottom, histograms of CD45, 2-NBDG and C12R levels of leukocytes and spiked tumor cells. The cut-off values of metabolic markers 2-NBDG and C12R is defined as mean plus five standard deviations of leukocytes, as indicated by the black lines.

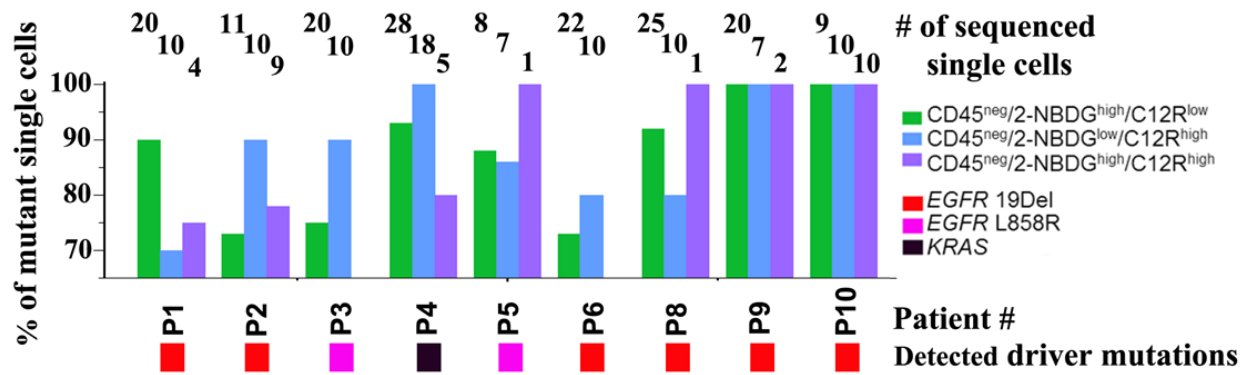

**Supplementary Fig. 5** Percentage of single cells harboring oncogenic driver mutations that determine the malignancy of metabolically active cells. The detected oncogenic driver mutations were consistent with those detected in cell blocks of MPE or primary tumor sites

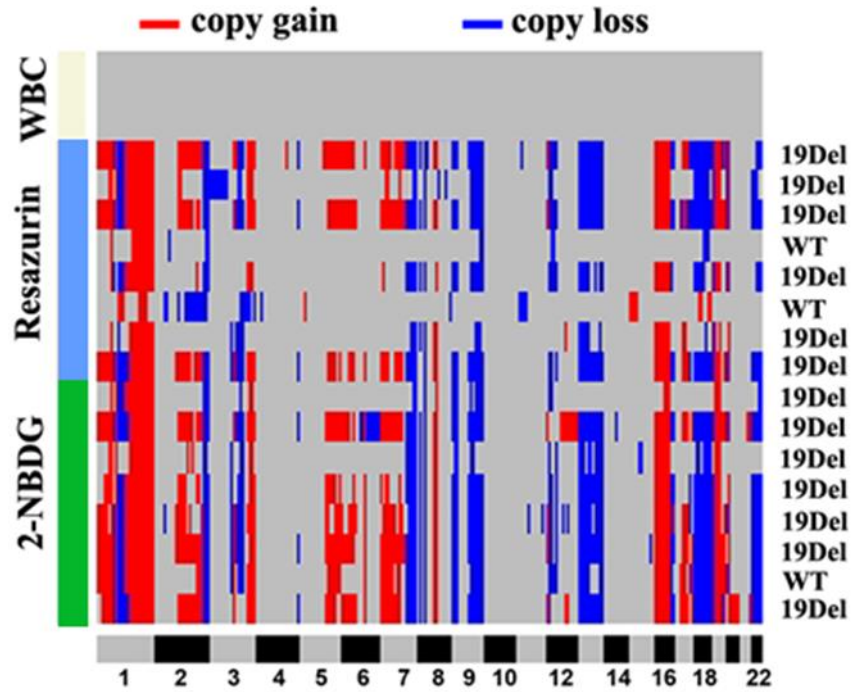

**Supplementary Fig. 6** Single-cell CNV profiles and detected *EGFR* mutation status of metabolically active cells and white blood cells from P1.

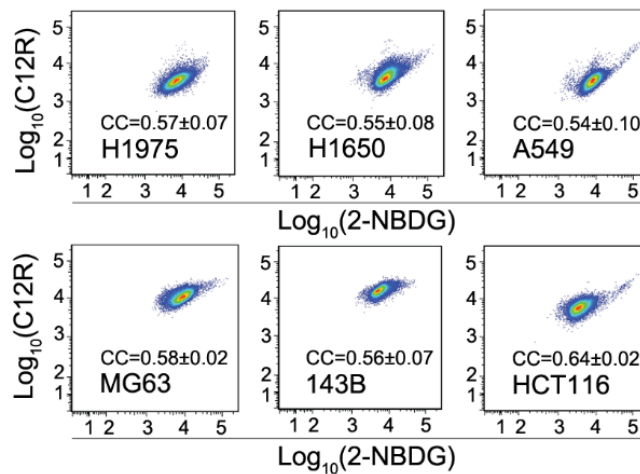

**Supplementary Fig. 7** Representative flow cytometry plots report 2-NBDG and C12R fluorescence signals of H1975, H1650, A549, MG63, 143B and HCT116 cells that were assayed by 600  $\mu\text{M}$  2-NBDG and 1  $\mu\text{M}$  C12R. 50,000 events were recorded for each sample. The correlation coefficients (CC) between 2-NBDG and C12R (mean  $\pm$  SD), derived from four independent experiments, in these cell lines range from 0.54 to 0.64.



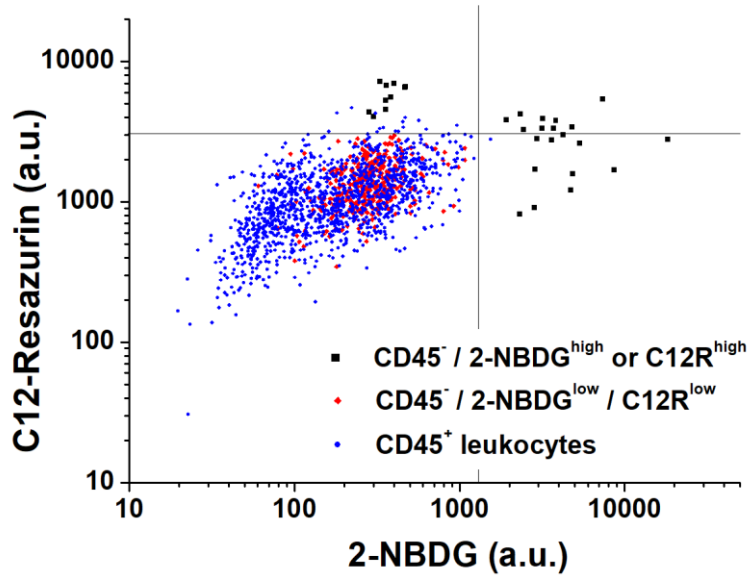

**Supplementary Fig. 8** Scatter plot of OMC assays on Patient 2 MPE samples. 2-NBDG and C12R fluorescence intensity of all CD45 negative cells (black and red dots) and a portion of CD45 positive cells (blue dots) are shown. The cut-offs for identification of 2-NBDG<sup>high</sup> and C12R<sup>high</sup> cells (black dots) are shown in the figure as the black lines. 2-NBDG<sup>high</sup> and C12R<sup>high</sup> cells are candidate tumor cells and gated out by five and three standard deviations above mean of CD45<sup>+</sup> leukocytes, respectively. Red dots represent CD45<sup>neg</sup>/2-NBDG<sup>low</sup>/C12R<sup>low</sup> cells and CD45<sup>pos</sup> leukocytes are displayed in blue dots. In Patient #2, 11 CD45<sup>neg</sup>/2-NBDG<sup>high</sup>/C12R<sup>low</sup> cells, 10 CD45<sup>neg</sup>/2-NBDG<sup>low</sup>/C12R<sup>high</sup> cells and 9 CD45<sup>neg</sup>/2-NBDG<sup>high</sup>/C12R<sup>high</sup> cells were identified as candidate tumor cells that were found to harbor an *EGFR* 19Del (p. L747\_E749del) and an A750P mutation in exon 19 of *EGFR*.

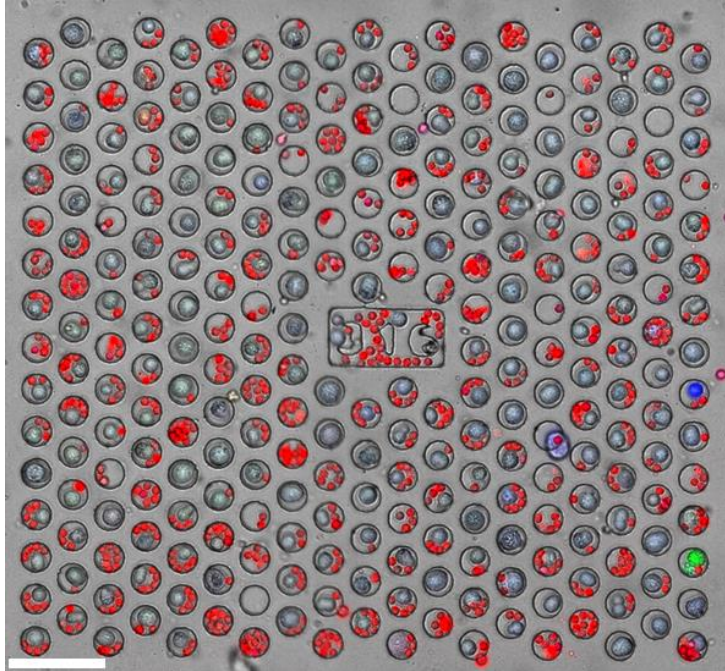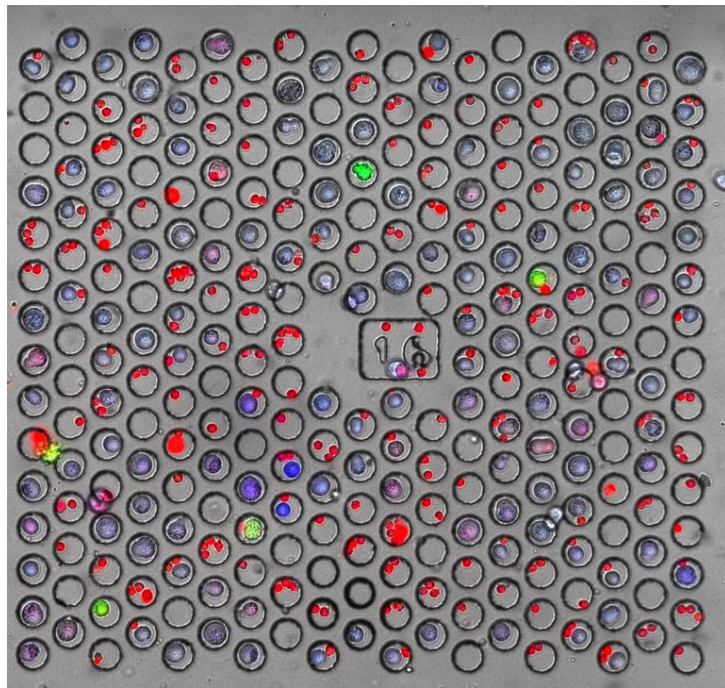

**Supplementary Fig. 9** The bright field and fluorescence composite images of representative blocks shows both C12R<sup>high</sup> cells and 2-NBDG<sup>high</sup> cells. The fluorescence signals of CD45, 2-NBDG and C12R are shown in red, green and blue, respectively (scale bar, 100  $\mu$ m).

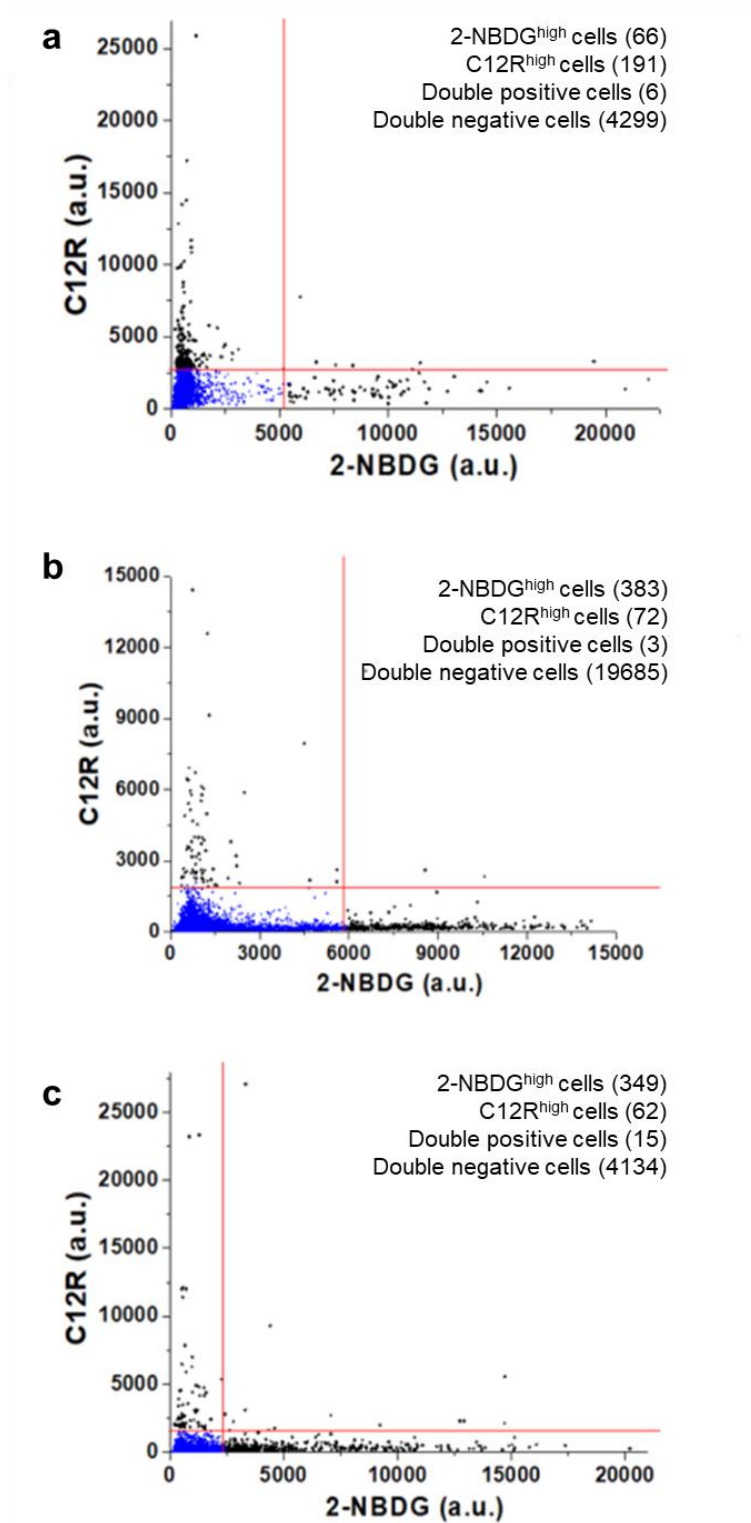

**Supplementary Fig. 10 a-c** Single-cell metabolic phenotyping of CD45 negative cells isolated from lung adenocarcinoma surgical resection tissues of three patients. Most of the metabolically active cells are differentially engaged in glycolysis or mitochondrial oxidation with very few double positive cells.

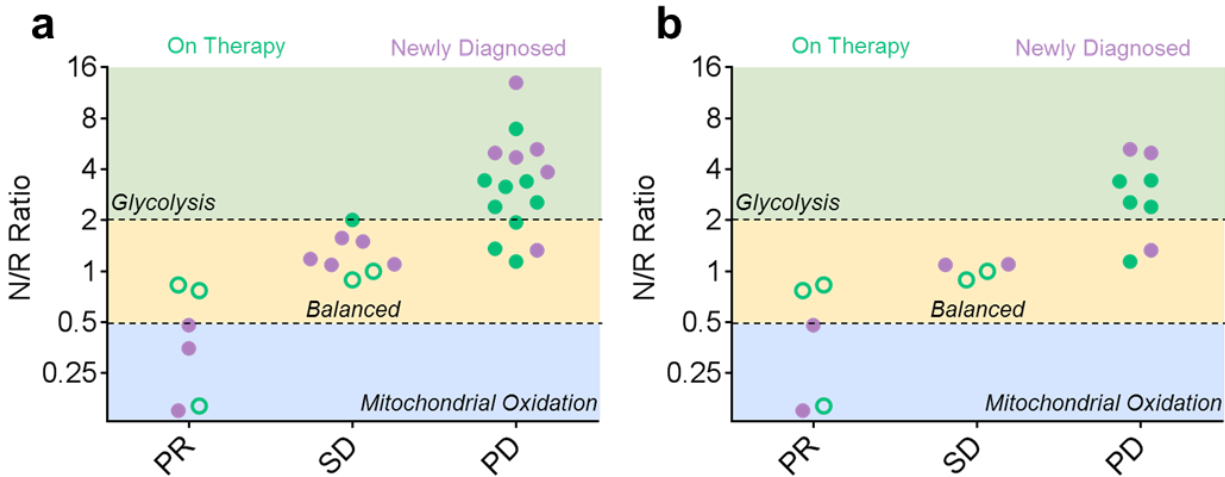

**Supplementary Fig. 11 a,b** N/R ratios calculated by metabolic phenotyping of MPE samples can predict patient therapy response profiles evaluated by RECIST criteria upon follow-up for all the patients **a** and for *EGFR*-mutant patient **b**. The different metabolic phenotypes of MPE samples that are classified by the boundary lines at  $N/R = 0.5$  and  $2$  can segregate patient response. The green dots denote patients who were on therapies at the MPE draw and metabolic phenotyping. The orchid dots denote newly diagnosed patients who were receiving first-line therapies after the MPE draw and metabolic phenotyping. The blank green dots represent the patients with a PR response to the current therapy at the time of MPE draw and the solid green dots represent those with a SD or PD response at the time of MPE draw. PR: partial response, SD: stable disease, PD: progressive disease.

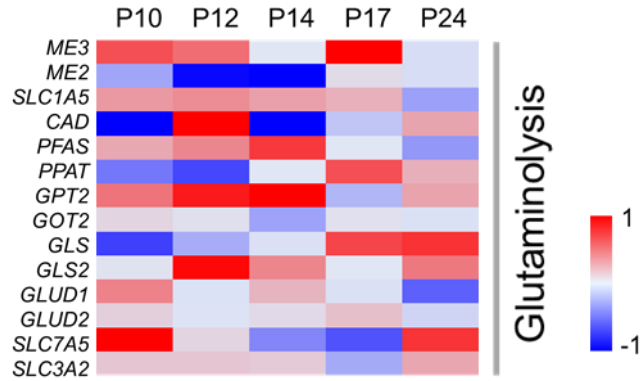

**Supplementary Fig. 12** Log<sub>2</sub> fold change of the expression levels of presentative genes involved in glutaminolysis between the two metabolic phenotypes (2-NBDG<sup>high</sup> vs C12R<sup>high</sup>) across 5 patients. The glutaminolysis-related genes showed a mixed pattern of change across patients.

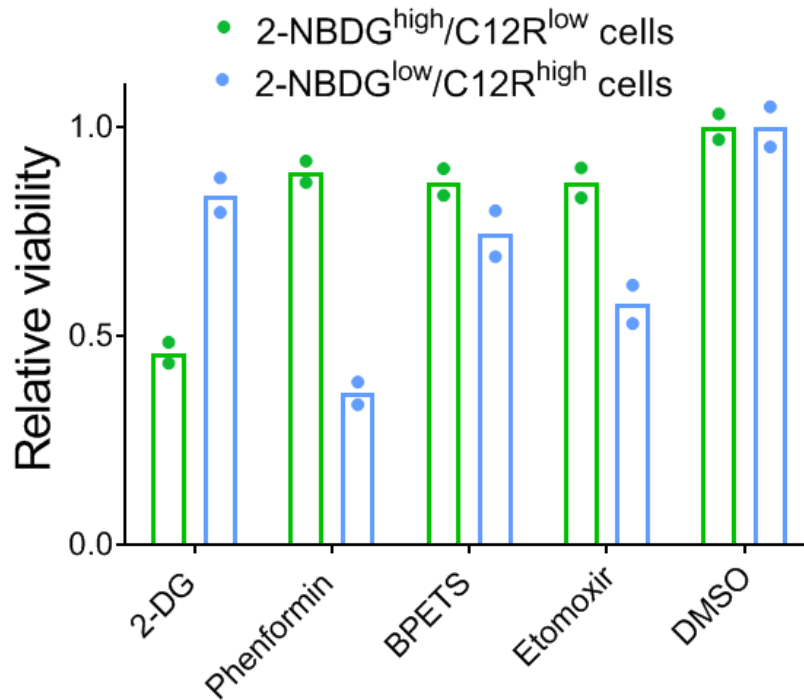

**Supplementary Fig. 13** Relative viability of two metabolically active cell populations in response to 2-DG (5 mM), phenformin (25  $\mu$ M), BPETS (10  $\mu$ M), and etomoxir (200  $\mu$ M), respectively, with respect to the DMSO control (\*  $P < 0.05$ ; \*\*  $P < 0.005$ ; NS, not significant). Data are presented as the mean  $\pm$  SD ( $n = 2$  independent samples for each condition). Source data are provided as a Source Data file.

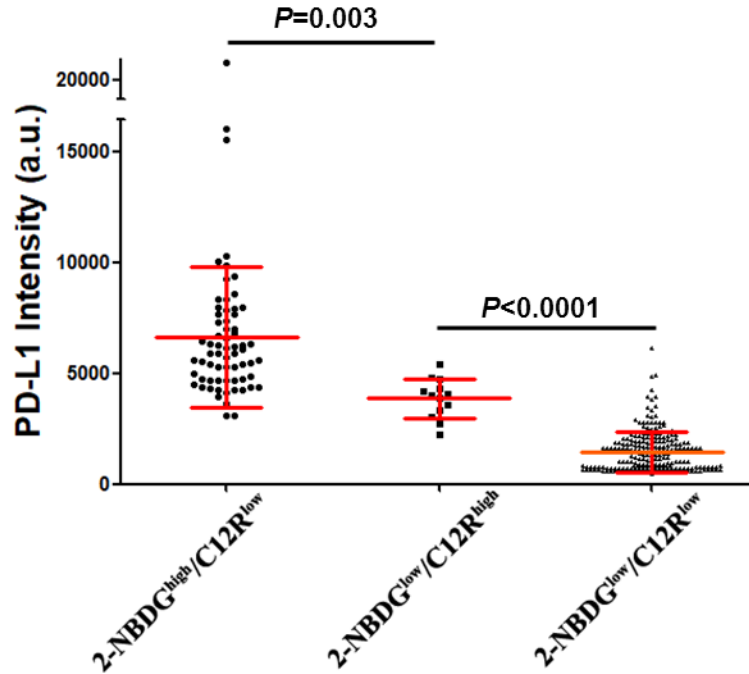

**Supplementary Fig. 14** PD-L1 expression levels, quantified by the single-cell immunofluorescence staining, for the three metabolic phenotypes of CD45<sup>neg</sup> cells from MPE sample of P31. All 2-NBDG<sup>high</sup>/C12R<sup>high</sup> cells (n=66) and 2-NBDG<sup>low</sup>/C12R<sup>high</sup> cells (n=13) on a chip as well as randomly selected double negative cells (n=244) were assayed and shown in the figure (mean  $\pm$  SD). Source data are provided as a Source Data file.

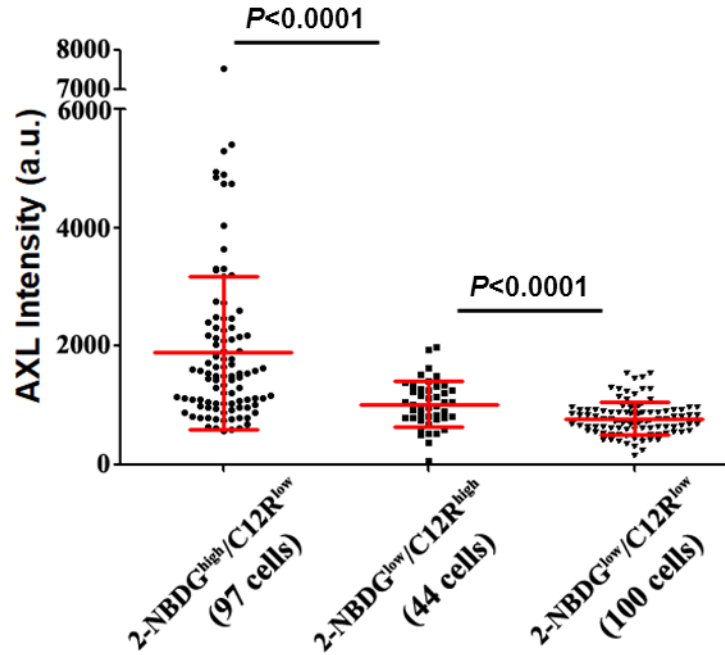

**Supplementary Fig. 15** AXL fluorescence intensity of the three metabolic phenotypes of CD45<sup>neg</sup> cells from MPE sample of P29. All 2-NBDG<sup>high</sup> cells (n=97) and C12R<sup>high</sup> (n=44) as well as randomly selected double negative cells (n=100) were assayed and shown in the figure (mean  $\pm$  SD). Source data are provided as a Source Data file.



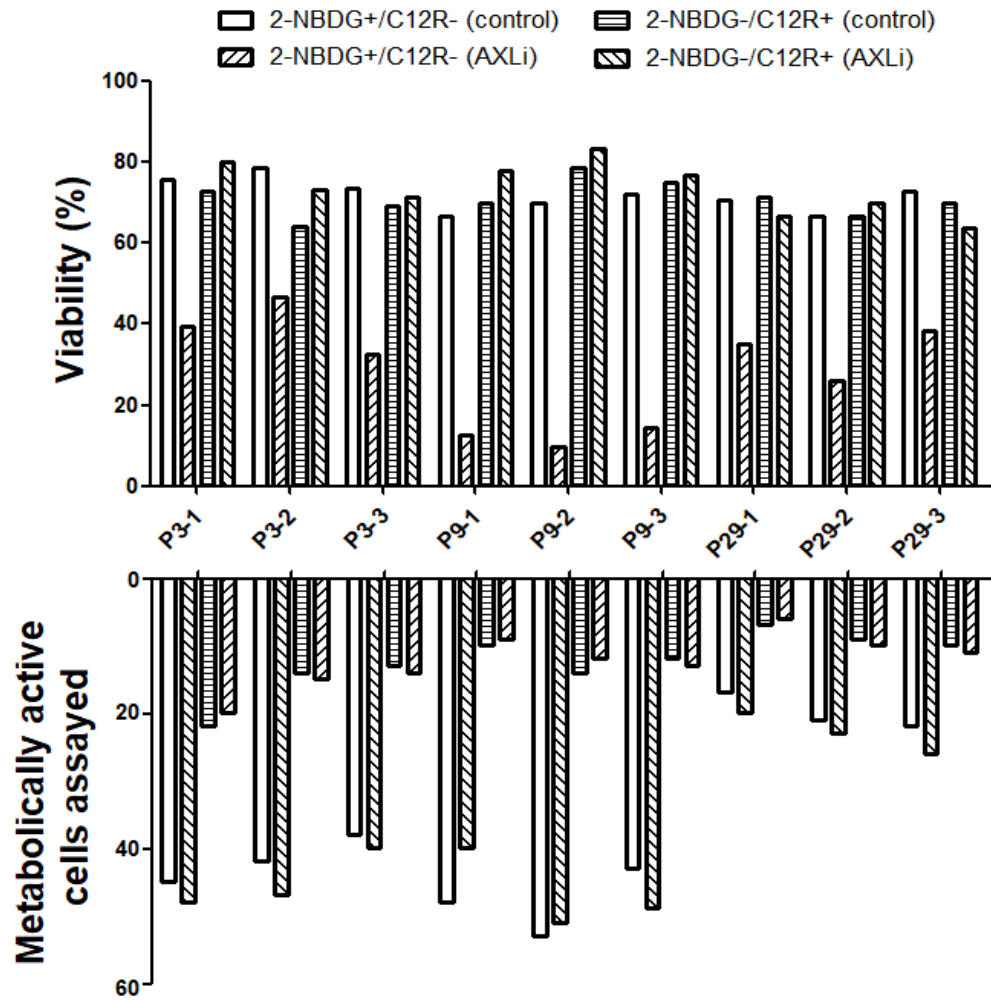

**Supplementary Fig. 16** The number and viability of metabolically active cells assayed under DMSO control and AXL inhibition treatment in P3, P9 and P29. Each experiment had three replicates.



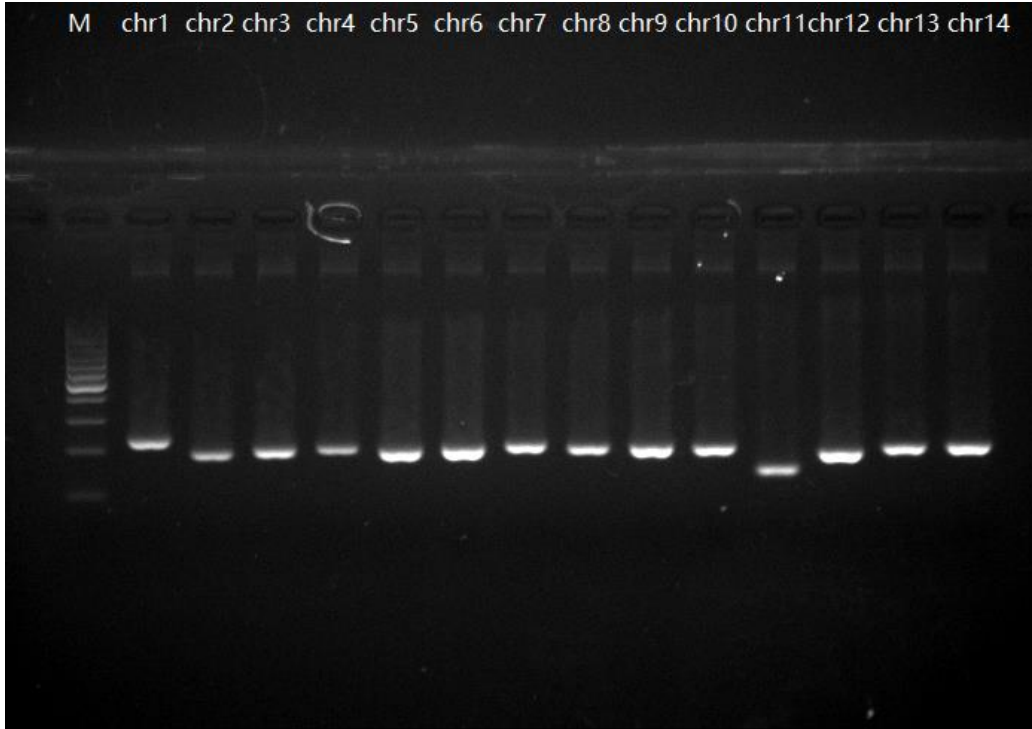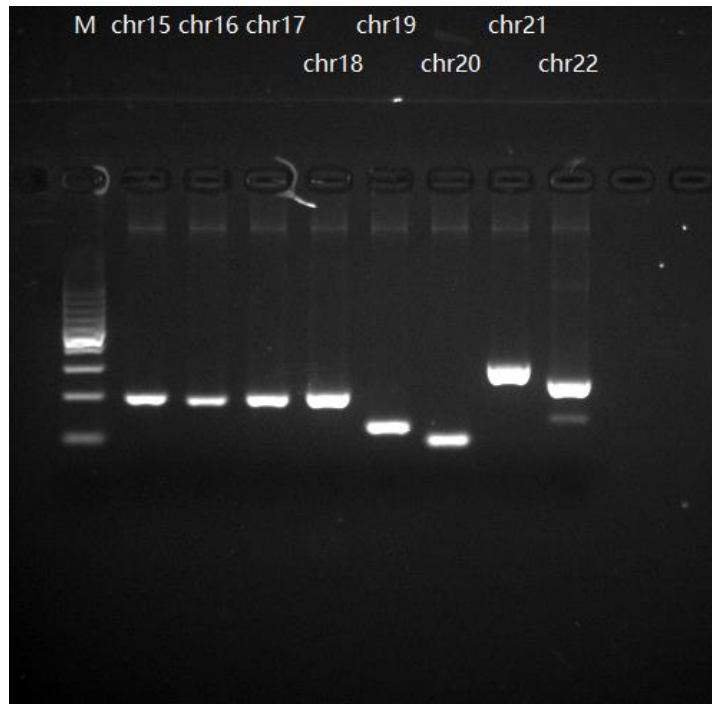

**Supplementary Fig. 17.** Evaluation of WGA efficiency using specific primers for 22 chromosomes (see Supplementary Table 5). 22 PCR reactions were performed and products of PCR reactions were separated by gel electrophoresis.

## Supplementary Tables

Supplementary Table 1 Metabolic phenotype, treatment history and other clinical metadata of LADC patients<sup>a</sup>.

| No. | Metabolic phenotype <sup>b</sup> | Treatment before PE draw                                       | Treatment at or after PE draw <sup>c</sup>                                 | ECOG at PE draw | Response at PE draw | ECOG at follow-up | Response at follow-up | Survival (months) |
|-----|----------------------------------|----------------------------------------------------------------|----------------------------------------------------------------------------|-----------------|---------------------|-------------------|-----------------------|-------------------|
| 1   | MO (0.48)                        | None                                                           | 1st line: Gefitinib                                                        | 1               | N/A                 | 0                 | PR                    | 20.6 (alive)      |
| 2   | B (1.10)                         | None                                                           | 1st line: Pentrexed+Carboplatin+Avastin                                    | 1               | N/A                 | 1                 | SD                    | 19.6 (alive)      |
| 3   | G (2.40)                         | 1st line: Icotinib; 2nd line: Pentrexed+Carboplatin            | 3rd line: Osimetrinib*; 4th line: Pentrexed+Avastin                        | 1               | SD                  | 2                 | PD                    | 15.6              |
| 4   | G (6.94)                         | 1st line: Pentrexed                                            | 2nd line: Vinorelbine*                                                     | 1               | PD                  | 5                 | Dead                  | 0.8               |
| 5   | B (1.14)                         | 1st line: Docetaxol+Carboplatin; 2nd line: Gefitinib           | 3rd line: Osimertinib*                                                     | 1               | SD                  | 5                 | Dead                  | 7.13              |
| 6   | B (0.71)                         | None                                                           | 1st line: Traditional Chinese Medicine*                                    | 1               | N/A                 | 2                 | PD                    | 9.1               |
| 7   | G (3.40)                         | None                                                           | 1st line: Pentrexed+Carboplatin*; 2nd line: Gefitinib; 3rd line: Docetaxol | 0               | PD                  | 1                 | PD                    | 10.1              |
| 8   | G (2.55)                         | None                                                           | 1st line: Gefitinib*; 2nd line: Pentrexed+Carboplatin                      | 1               | PD                  | 5                 | Dead                  | 7.03              |
| 9   | G (5.00)                         | None                                                           | 1st line: Gefitinib                                                        | 2               | N/A                 | 5                 | Dead                  | 1.93              |
| 10  | MO (0.15)                        | None                                                           | 1st line: Gefinitib+Furuquitinib                                           | 1               | N/A                 | 0                 | PR                    | 15.2 (alive)      |
| 11  | B (1.33)                         | None                                                           | 1st line: Pentrexed+Carboplatin                                            | 2               | N/A                 | 5                 | Dead                  | 7.23              |
| 12  | G (3.44)                         | 1st line: Pentrexed+Carboplatin; 2nd line: Icotinib; 3rd line: | 5th line: Osimetrinib*                                                     | 1               | SD                  | 5                 | Dead                  | 4.03              |

|    |           |                                                                                                                                 |                                                            |   |     |   |      |              |
|----|-----------|---------------------------------------------------------------------------------------------------------------------------------|------------------------------------------------------------|---|-----|---|------|--------------|
|    |           | Pemtrexed+Avastin; 4th line:<br>Avastin                                                                                         |                                                            |   |     |   |      |              |
| 13 | B (0.83)  | 1st line:<br>Pemtrexed+Carboplatin+Avastin                                                                                      | 2nd line: Gefitinib                                        | 1 | PR  | 1 | PR   | 16.0 (alive) |
| 14 | B (1.36)  | 1st line: Gefitinib; 2nd line:<br>Osimertinib                                                                                   | 3rd line: Tegafur Gimeracil<br>Oteracil Potassium Capsule* | 2 | PD  | 5 | Dead | 7.13         |
| 15 | MO (0.35) | None                                                                                                                            | 1st line: Crizotinib                                       | 1 | N/A | 0 | PR   | 15.9 (alive) |
| 16 | G (13.00) | None                                                                                                                            | 1st line: Pemtrexed+Carboplatin                            | 2 | N/A | 5 | Dead | 2.43         |
| 17 | MO (0.16) | None                                                                                                                            | 1st line: Gefinitib+Furuquitinib*                          | 1 | PR  | 0 | PR   | 14.8 (alive) |
| 18 | B (1.09)  | None                                                                                                                            | 1st line: Icotinib                                         | 1 | N/A | 1 | SD   | 20.0 (alive) |
| 19 | B (0.89)  | 1st line: Pemtrexed+Carboplatin                                                                                                 | 2nd line: Gefitinib*                                       | 1 | PR  | 1 | SD   | 17.7 (alive) |
| 20 | G (3.86)  | None                                                                                                                            | 1st line: Gemcitabine+Carboplatin                          | 2 | N/A | 5 | Dead | 3.03         |
| 21 | MO (0.12) | None                                                                                                                            | No anti-cancer treatment                                   | 2 |     | 5 | Dead | 3.03         |
| 22 | B (1.50)  | None                                                                                                                            | 1st line: Pemtrexed+Carboplatin                            | 2 | N/A | 2 | SD   | 15.4 (alive) |
| 23 | B (1.57)  | None                                                                                                                            | 1st line: Pemtrexed+Carboplatin                            | 1 | N/A | 1 | SD   | 10.3         |
| 24 | B (1.94)  | Adjuvant:<br>Navelbine+Carboplatin; 1st line:<br>Gem+Carboplatin; 2nd line:<br>Pemtrexed+Carboplatin; 3rd<br>line: Fruquintinib | 4th line: Tegafur Gimeracil<br>Oteracil Potassium Capsule  | 1 | SD  | 5 | Dead | 5.93         |
| 25 | B (1.18)  | None                                                                                                                            | 1st line: Pemtrexed+Carboplatin                            | 1 | N/A | 1 | SD   | 14.3 (alive) |
| 26 | B (1.00)  | Adjuvant:<br>Navelbine+Carboplatin; 1 st<br>line: Gefitinib                                                                     | 2nd line: Osimertinib                                      | 1 | PR  | 1 | SD   | 14.3 (alive) |
| 27 | G (3.15)  | None                                                                                                                            | 1st line: Crizotinib*                                      | 1 | SD  | 5 | Dead | 5.5          |
| 28 | B (0.77)  | 1st line: Pemtrexed+Carboplatin                                                                                                 | 2nd line: Gefitinib*                                       | 1 | PR  | 1 | PR   | 5.9 (alive)  |
| 29 | G (2.01)  | None                                                                                                                            | 1st line: Pemtrexed+Carboplatin*                           | 1 | SD  | 1 | SD   | 6.0 (alive)  |
| 30 | G (4.70)  | None                                                                                                                            | 1st line: Gemcitabine+Carboplatin                          | 1 | N/A | 5 | Dead | 3.6          |

|    |          |      |                     |   |     |                  |                  |                  |
|----|----------|------|---------------------|---|-----|------------------|------------------|------------------|
| 31 | G (5.25) | None | 1st line: Gefitinib | 2 | N/A | 5                | Dead             | 1.3              |
| 32 | R (0.04) | None | N/A <sup>d</sup>    | 1 | N/A | N/A <sup>d</sup> | N/A <sup>d</sup> | N/A <sup>d</sup> |

<sup>a</sup>Newly diagnosed patients are highlighted in grey. For P2, while the OMC assay identified *EGFR*<sup>19Del</sup> driver oncogene mutation in the MPE, the clinical standard cell block analysis failed to identify any driver mutations due to the low abundance of tumor cells in the MPE. P2 was therefore treated as wild type patients with chemotherapy. P6 was not receiving appropriate anti-tumor treatment after diagnosis due to financial reasons. He instead only received palliative care with traditional Chinese medicine. P16 bearing *ROS1* gene alteration was receiving the 1<sup>st</sup> line treatment before the approval of crizotinib by China FDA (September 2017). He therefore received 1<sup>st</sup> line chemotherapy treatment. P21 had an underdetermined pathological diagnosis and thus did not receive any clinical treatment. <sup>b</sup>Key for metabolic phenotypes: G, glycolysis (N/R≥2); B, balanced (0.5<N/R<2); MO, mitochondrial oxidation (N/R≤0.5. <sup>c</sup>The \* represents PE development in the treatment (not prior to the treatment). <sup>d</sup>This patient was most recently enrolled in this study and treatment-naïve.

**Supplementary Table 2. Primers used in this study for targeting oncogenic driver mutations. All primers were synthesized by Life Technologies.**

| <b>Name</b> | <b>Sequence</b>          |
|-------------|--------------------------|
| BRAF-15F    | CTCATCCTAACACATTTCAAGCCC |
| BRAF-15R    | CAGCATCTCAGGGCCAA        |
| KRAS-2F     | TGAGAGCCTTTAGCCGCC       |
| KRAS-2R     | TACCCTCTCACGAAACTCTG     |
| EGFR-18F    | TGGAGAAGCTCCCAACCAA      |
| EGFR-18R    | TTCCCAAACACTCAGTGAAACA   |
| EGFR-19F    | GTGGCACCATCTCACAATT      |
| EGFR-19R    | ATGCTCCAGGCTCACCAAG      |
| EGFR-20F    | CTTTATCCAATGTGCTCCTC     |
| EGFR-20R    | TCTCCCTTCCCTGATTACCT     |
| EGFR-21F    | TTCGCCAGCCATAAGTCCT      |
| EGFR-21R    | TCATTCAGTGTCCCAGCAAG     |

**Supplementary Table 3. Explanatory and observation variable matrices used in PLS-DA model<sup>a</sup>.**

| Explanatory variables |        |      |    |      |                                       | Observation variables |                         |
|-----------------------|--------|------|----|------|---------------------------------------|-----------------------|-------------------------|
| Patient               | 2-NBDG | C12R | DP | N/R  | Metabolically active cells / 10 mL PE | RECIST                | Response Classification |
| P1                    | 20     | 42   | 4  | 0.48 | 30                                    | PR                    | P                       |
| P2                    | 11     | 10   | 9  | 1.1  | 61                                    | SD                    | P                       |
| P3                    | 36     | 15   | 0  | 2.4  | 11                                    | PD                    | N                       |
| P4                    | 125    | 18   | 5  | 6.94 | 37                                    | Dead                  | N                       |
| P5                    | 8      | 7    | 1  | 1.14 | 2                                     | Dead                  | N                       |
| P7                    | 34     | 10   | 3  | 3.4  | 40                                    | PD                    | N                       |
| P8                    | 51     | 20   | 1  | 2.55 | 185                                   | Dead                  | N                       |
| P9                    | 35     | 7    | 2  | 5    | 157                                   | Dead                  | N                       |
| P10                   | 9      | 59   | 17 | 0.15 | 79                                    | PR                    | P                       |
| P11                   | 12     | 9    | 2  | 1.33 | 3                                     | Dead                  | N                       |
| P12                   | 31     | 9    | 3  | 3.44 | 6                                     | PD                    | N                       |
| P13                   | 10     | 12   | 6  | 0.83 | 6                                     | PR                    | P                       |
| P14                   | 19     | 14   | 1  | 1.36 | 20                                    | Dead                  | N                       |
| P15                   | 16     | 46   | 24 | 0.35 | 430                                   | PR                    | P                       |
| P16                   | 26     | 2    | 18 | 13   | 41                                    | Dead                  | N                       |
| P17                   | 3      | 19   | 1  | 0.16 | 2                                     | PR                    | P                       |
| P18                   | 12     | 11   | 3  | 1.09 | 33                                    | SD                    | P                       |
| P19                   | 8      | 9    | 0  | 0.89 | 3                                     | SD                    | P                       |
| P20                   | 27     | 7    | 10 | 3.86 | 11                                    | Dead                  | N                       |
| P22                   | 15     | 10   | 2  | 1.5  | 17                                    | SD                    | P                       |
| P23                   | 11     | 7    | 7  | 1.57 | 3                                     | SD                    | P                       |
| P24                   | 33     | 17   | 18 | 1.94 | 309                                   | PD                    | N                       |
| P25                   | 26     | 22   | 9  | 1.18 | 1267                                  | SD                    | P                       |
| P26                   | 10     | 10   | 1  | 1    | 11                                    | SD                    | P                       |
| P27                   | 299    | 95   | 23 | 3.15 | 334                                   | Dead                  | N                       |
| P28                   | 37     | 48   | 15 | 0.77 | 3333                                  | PR                    | P                       |
| P29                   | 23     | 11   | 6  | 2.01 | 80                                    | SD                    | P                       |
| P30                   | 127    | 27   | 20 | 4.7  | 1933                                  | Dead                  | N                       |
| P31                   | 63     | 12   | 5  | 5.25 | 267                                   | Dead                  | N                       |

<sup>a</sup>Columns titled 2-NBDG and C12R list the number of CD45<sup>neg</sup>, 2-NBDG<sup>high</sup> and C12R<sup>high</sup> cells per 500,000 input cells, respectively. DP denotes the number of double positive cells

(CD45<sup>neg</sup>/2-NBDG<sup>high</sup>/C12R<sup>high</sup>). Metabolically active cells include all the 2-NBDG<sup>high</sup>, C12R<sup>high</sup>, and double positive CD45<sup>neg</sup> cells.

**Supplementary Table 4. Prior and posterior classification and scores using leave-one-out validation.**

| Patient | Weight | Response | Predicted Response | P(N)  | P(P)  |
|---------|--------|----------|--------------------|-------|-------|
| P1      | 1      | P        | P                  | 0.371 | 0.629 |
| P2      | 1      | P        | P                  | 0.423 | 0.577 |
| P3      | 1      | N        | N                  | 0.515 | 0.485 |
| P4      | 1      | N        | N                  | 0.804 | 0.196 |
| P5      | 1      | N        | <b>P</b>           | 0.425 | 0.575 |
| P7      | 1      | N        | N                  | 0.563 | 0.437 |
| P8      | 1      | N        | N                  | 0.532 | 0.468 |
| P9      | 1      | N        | N                  | 0.636 | 0.364 |
| P10     | 1      | P        | P                  | 0.323 | 0.677 |
| P11     | 1      | N        | <b>P</b>           | 0.438 | 0.562 |
| P12     | 1      | N        | N                  | 0.563 | 0.437 |
| P13     | 1      | P        | P                  | 0.408 | 0.592 |
| P14     | 1      | N        | <b>P</b>           | 0.442 | 0.558 |
| P15     | 1      | P        | P                  | 0.344 | 0.656 |
| P16     | 1      | N        | N                  | 0.885 | 0.115 |
| P17     | 1      | P        | P                  | 0.361 | 0.639 |
| P18     | 1      | P        | P                  | 0.423 | 0.577 |
| P19     | 1      | P        | P                  | 0.412 | 0.588 |
| P20     | 1      | N        | N                  | 0.579 | 0.421 |
| P22     | 1      | P        | P                  | 0.448 | 0.552 |
| P23     | 1      | P        | P                  | 0.450 | 0.550 |
| P24     | 1      | N        | <b>P</b>           | 0.478 | 0.522 |
| P25     | 1      | P        | P                  | 0.395 | 0.605 |
| P26     | 1      | P        | P                  | 0.418 | 0.582 |
| P27     | 1      | N        | N                  | 0.789 | 0.211 |
| P28     | 1      | P        | P                  | 0.302 | 0.698 |
| P29     | 1      | P        | P                  | 0.480 | 0.520 |
| P30     | 1      | N        | N                  | 0.672 | 0.328 |
| P31     | 1      | N        | N                  | 0.675 | 0.325 |

**Supplementary Table 5. Primers used in this study for targeting 22 loci on different chromosomes. All primers were synthesized by Genewiz (Suzhou, China).**

| <b>Name</b> | <b>Sequence</b>        |
|-------------|------------------------|
| Chr1F       | TTTAGGCGTCATCTGAGGGTA  |
| Chr1R       | TGGCAGCAGTATGGAGAATGTA |
| Chr2F       | AGCGGGAGGGACTATTTAC    |
| Chr2R       | GGATCGTTCAAAGGGAAGT    |
| Chr3F       | CCCTTGTACTGGCTCGTGTT   |
| Chr3R       | CTTGACATGAAGGTCTGGA    |
| Chr4F       | GAGCATCTCTTGGCTCTGCT   |
| Chr4R       | TTGGGAAAGCACAGATCCTT   |
| Chr5F       | ACGGACAGTGGACAGATTGC   |
| Chr5R       | CCACTGTGCCACCCATT      |
| Chr6F       | GAGGAGGGCAAGGAGAGAGT   |
| Chr6R       | ACCCTCCAGTGTGCAAAAAC   |
| Chr7F       | CTTCCTGCCATTCCACAAGT   |
| Chr7R       | CCCACCTTTCATGCCTCTGAT  |
| Chr8F       | CTTCCCTGCCTTGCTCTCTA   |
| Chr8R       | CGGGACATTTTCAGCAATCTT  |
| Chr9F       | CTGTGGAGCAGCTGTTTCTG   |
| Chr9R       | GAATTCACAAAGCCCAAGA    |
| Chr10F      | CCCCTCATTCAAATCAGCAT   |
| Chr10R      | CAGGCAAAAGCTGGAGTTTC   |
| Chr11F      | TGAATGAGAACGCAGATGTGA  |
| Chr11R      | CACAAAGCATCCAGGGTCATT  |
| Chr12F      | ATCATGGAAATGCAGCCTCT   |
| Chr12R      | AGAACCCAGCTGGAATGATG   |
| Chr13F      | TGTTTCATGGAGTCCTGCTG   |
| Chr13R      | GGAGGCAAGAACCAAACAAA   |
| Chr14F      | AGCCAAGACGTACCCTCTCA   |
| Chr14R      | TGCTTTACACCAATCCCACA   |
| Chr15F      | TCAGCATGGGTTATGGGTTT   |
| Chr15R      | CCCAGATGATGGAGAGGAAA   |
| Chr16F      | GCCTGTGTTTGCTGATGAAA   |
| Chr16R      | GGGCAACGACCGTACTTAAA   |
| Chr17F      | TCCTGGGCTAGCCTTTTACA   |
| Chr17R      | ATCGCTTGAGCACTGAAGGT   |
| Chr18F      | AGACGAGCCTTTCTCTGTCG   |



|        |                        |
|--------|------------------------|
| Chr18R | TCGAGACCATCCCCACTAAC   |
| Chr19F | AGTTGAGGAGATGGTGGAGC   |
| Chr19R | AACAGGAGCCTTGGTCAGTC   |
| Chr20F | CTGGTCAAACATCTCCCTCGT  |
| Chr20R | CTCCACGCATCTTACATCACCT |
| Chr21F | GGACTTTGCTGACGGGATTA   |
| Chr21R | GAACTAACGACCTCACGCTTG  |
| Chr22F | TCCACAACCCCTTATCTTACCC |
| Chr22R | ACCTCAGGTGATCTACCCGC   |
